# Supplementary material for: Thioridazine Induces Major Changes in Global Gene Expression and Cell Wall Composition in Methicillin-Resistant Staphylococcus aureus USA300
Source: PubMed Central journal article supplement (PMC3656896; doi:10.1371/journal.pone.0064518), 2013-05-17
Supplement: pone.0064518.s006.pdf [file pone.0064518.s006.pdf]

**Table S1. Primers used in this study.**

| Gene name   | Gene ID       | Sequence (5'-3'), forward/reverse primer             |
|-------------|---------------|------------------------------------------------------|
| <i>rpoA</i> | SAUSA300_2178 | ATGAAGGCGAAGTAACAGCAA/TGCAATTTTAAGCTCTGGGTTT         |
| <i>gyrB</i> | SAUSA300_0005 | GAAGCATTAGCTGGTTATGCAA/CCACGTCGGTTATCCGTTAC          |
| <i>mecA</i> | SAUSA300_0032 | ACGGTAACATTGATCGCAAC/AATGACGCTATGATCCCAATC           |
| <i>relA</i> | SAUSA300_1590 | ACCCGCTCGAAATCCAAATA/GTAAGCCCAGTGTGCTGCAA            |
| <i>saeR</i> | SAUSA300_0691 | TTGAACAACCTGTCGTTTATGA/ACGCATAGGGACTTCGTGAC          |
| <i>sirA</i> | SAUSA300_0117 | ATATCAAGGTGCCACTGACG/TTCGGTTTTTGTGTCCATGA            |
| <i>saeP</i> | SAUSA300_0693 | AATCATCAAAAGGTCCAGATTTAT/TCAACCATTGCGATTTCTTT        |
| <i>cspB</i> | SAUSA300_2639 | CGCTAGCGATGGCTACAAAA/GGTCTCCACGTTGACCTTCA            |
| <i>coa</i>  | SAUSA300_0224 | TACGGCTGGTAAAGCTGAAGA/CTGTAATTGTGCCCTGTGGA           |
| <i>ctsR</i> | SAUSA300_0507 | TGGTGGTTACATCCGAATCA/GTCCAATCAGCTGAAGCAA             |
| <i>sarA</i> | SAUSA300_0605 | TGGTCACTTATGCTGACAAATTAAT/TGTCAATACAGCGAATTCTT<br>CA |
| <i>oppB</i> | SAUSA300_0887 | CAGTAGCTGGATGGGAAGGT/TGGCGACAGTTGCTAAAACA            |
|             | SAUSA300_0986 | TGGCATTTCGATACATCTTCC/CGCACCTTTAACTTGCTGAGT          |
| <i>ilvD</i> | SAUSA300_2006 | TTGGTTTTGACGGCGTATTTT/TTTGTCTCATGGCTGCTAA            |
| <i>spsA</i> | SAUSA300_0867 | GCCAAACCTGGTCAATCAAT/TTGGCATAAGATGCGTCAAC            |
| <i>accB</i> | SAUSA300_1564 | GCACACAGTAATCAATCAAATCAA/GTCGAAACATCGGAGTTATC<br>A   |
| <i>vraR</i> | SAUSA300_1865 | GGTAAAGAAGCAATTGCCAAA/CACCATCCATGTCATCCATAA          |
