# Supplementary material for: Thioridazine Induces Major Changes in Global Gene Expression and Cell Wall Composition in Methicillin-Resistant Staphylococcus aureus USA300
Source: PubMed Central journal article supplement (PMC3656896; doi:10.1371/journal.pone.0064518), 2013-05-17
Supplement: pone.0064518.s007.pdf [file pone.0064518.s007.pdf]

**Table S2. Genes upregulated by TDZ exposure**

| Functional group and annotation <sup>a</sup>                      |                   | Gene         | Assignment                                                              | log <sub>2</sub> expression ratio |                         | Early CWB <sup>c</sup> | D-CYC <sup>d</sup> | VAN <sup>e</sup> | BAC <sup>f</sup> | OXA <sup>g</sup> | Δ <i>codY</i> <sup>h</sup> |
|-------------------------------------------------------------------|-------------------|--------------|-------------------------------------------------------------------------|-----------------------------------|-------------------------|------------------------|--------------------|------------------|------------------|------------------|----------------------------|
| USA300                                                            | N315 <sup>b</sup> |              |                                                                         | TDZ vs. untreated                 | TDZ + DCX vs. untreated |                        |                    |                  |                  |                  |                            |
| <b>Amino acid biosynthesis*</b>                                   |                   |              |                                                                         |                                   |                         |                        |                    |                  |                  |                  |                            |
| SAUSA300_0357                                                     | SA0344            | <i>metE</i>  | 5-methyltetrahydropteroyltriglutamate--homocysteine S-methyltransferase | 1.7                               | 1.9                     |                        |                    | up               |                  |                  | up                         |
| SAUSA300_0358                                                     | SA0345            |              | putative 5-methyltetrahydrofolate--homocysteine methyltransferase       |                                   | 1.1                     |                        |                    | up               |                  |                  | up                         |
| SAUSA300_0359                                                     | SA0346            |              | trans-sulfuration enzyme family protein                                 |                                   | 1.1                     | up                     |                    | up               |                  |                  | up                         |
| SAUSA300_0445                                                     | SA0430            | <i>gltB</i>  | glutamate synthase, large subunit                                       | 1.8                               | 2.0                     | up                     |                    |                  |                  | up               | up                         |
| SAUSA300_0446                                                     | SA0431            | <i>gltD</i>  | glutamate synthase, small subunit                                       | 1.5                               | 1.6                     | up                     | up                 | up               |                  | up               | up                         |
| SAUSA300_0860                                                     | SA0818            | <i>rocD</i>  | Ornithine aminotransferase                                              |                                   | 1.1                     | up                     |                    |                  |                  |                  |                            |
| SAUSA300_0864                                                     | SA0822            | <i>argG</i>  | argininosuccinate synthase                                              |                                   | 1.1                     |                        |                    |                  |                  |                  |                            |
| SAUSA300_1225                                                     | SA1163            |              | aspartate kinase                                                        | 3.1                               | 3.3                     | up                     |                    | up               |                  |                  | up                         |
| SAUSA300_1226                                                     | SA1164            | <i>dhoM</i>  | homoserine dehydrogenase                                                | 2.5                               | 2.7                     | up                     |                    | up               |                  |                  | up                         |
| SAUSA300_1227                                                     | SA1165            | <i>thrC</i>  | threonine synthase                                                      | 2.7                               | 2.9                     | up                     | up                 | up               |                  | up               | up                         |
| SAUSA300_1228                                                     | SA1166            | <i>thrB</i>  | homoserine kinase                                                       | 2.8                               | 2.9                     | up                     | up                 |                  | up               | up               | up                         |
| SAUSA300_1264                                                     | SA1201            | <i>trpD</i>  | anthranilate phosphoribosyltransferase                                  |                                   | 1.1                     |                        |                    |                  |                  |                  |                            |
| SAUSA300_1265                                                     | SA1202            | <i>trpC</i>  | indole-3-glycerol phosphate synthase                                    | 1.7                               | 2.2                     |                        |                    |                  |                  |                  | up                         |
| SAUSA300_1266                                                     | SA1203            | <i>trpF</i>  | N-(5-phosphoribosyl)anthranilate isomerase                              |                                   | 1.4                     |                        |                    |                  |                  |                  | up                         |
| SAUSA300_1267                                                     | SA1204            | <i>trpB</i>  | tryptophan synthase, beta subunit                                       | 1.1                               | 1.4                     |                        |                    |                  |                  |                  | up                         |
| SAUSA300_1286                                                     | SA1225            | <i>lysC</i>  | aspartate kinase                                                        | 3.7                               | 4.2                     |                        |                    |                  |                  |                  | up                         |
| SAUSA300_1287                                                     | SA1226            | <i>asd</i>   | aspartate semialdehyde dehydrogenase                                    | 4.0                               | 4.5                     | up                     |                    | up               |                  |                  | up                         |
| SAUSA300_1288                                                     | SA1227            | <i>dapA</i>  | dihydrodipicolinate synthase                                            | 3.6                               | 4.0                     | up                     |                    | up               |                  |                  | up                         |
| SAUSA300_1289                                                     | SA1228            | <i>dapB</i>  | dihydrodipicolinate reductase                                           | 3.0                               | 3.3                     | up                     |                    | up               | up               |                  | up                         |
| SAUSA300_1290                                                     | SA1229            | <i>dapD</i>  | tetrahydrodipicolinate acetyltransferase                                | 2.8                               | 3.2                     | up                     |                    | up               | up               |                  | up                         |
| SAUSA300_1293                                                     | SA1232            | <i>lysA</i>  | diaminopimelate decarboxylase                                           | 1.3                               | 1.5                     |                        |                    |                  | up               |                  | up                         |
| SAUSA300_1299                                                     | SA1238            |              | putative tellurite resistance protein                                   | 1.5                               | 1.6                     | up                     |                    |                  |                  |                  |                            |
| SAUSA300_1670                                                     | SA1545            | <i>serA</i>  | D-3-phosphoglycerate dehydrogenase                                      | 1.8                               | 1.9                     | up                     |                    | up               | up               |                  | up                         |
| SAUSA300_2006                                                     | SA1858            | <i>ilvD</i>  | dihydroxy-acid dehydratase                                              | 1.4                               | 1.7                     | up                     | up                 |                  |                  |                  | up                         |
| SAUSA300_2007                                                     | SA1859            | <i>ilvB</i>  | acetolactate synthase, large subunit                                    | 1.7                               | 2.0                     | up                     | up                 |                  |                  |                  | up                         |
| SAUSA300_2008                                                     | SA1860            | <i>ilvN</i>  | acetolactate synthase, small subunit                                    | 2.4                               | 2.8                     | up                     | up                 |                  |                  |                  | up                         |
| SAUSA300_2009                                                     | SA1861            | <i>ilvC</i>  | ketol-acid reductoisomerase                                             | 2.4                               | 2.8                     | up                     | up                 |                  | up               | up               | up                         |
| SAUSA300_2010                                                     | SA1862            | <i>leuA</i>  | 2-isopropylmalate synthase                                              | 2.2                               | 2.6                     | up                     |                    |                  |                  |                  | up                         |
| SAUSA300_2011                                                     | SA1863            | <i>leuB</i>  | 3-isopropylmalate dehydrogenase                                         | 1.8                               | 2.1                     | up                     | up                 |                  |                  |                  | up                         |
| SAUSA300_2012                                                     | SA1864            | <i>leuC</i>  | 3-isopropylmalate dehydratase, large subunit                            | 1.6                               | 2.0                     | up                     |                    |                  |                  |                  | up                         |
| SAUSA300_2013                                                     | SA1865            | <i>leuD</i>  | 3-isopropylmalate dehydratase, small subunit                            | 1.5                               | 1.8                     | up                     |                    |                  |                  |                  | up                         |
| SAUSA300_2014                                                     | SA1866            | <i>ilvA</i>  | threonine dehydratase                                                   | 1.5                               | 1.7                     | up                     |                    |                  |                  |                  | up                         |
| SAUSA300_2605                                                     | SA2464            | <i>hisIE</i> | histidine biosynthesis bifunctional protein hisIE                       | 2.6                               | 2.8                     |                        |                    | up               |                  |                  | up                         |
| SAUSA300_2606                                                     | SA2465            | <i>hisF</i>  | imidazole glycerol phosphate synthase subunit hisF                      | 2.6                               | 2.9                     |                        |                    | up               |                  |                  | up                         |
| SAUSA300_2607                                                     | SA2466            |              | phosphoribosylformimino-5-aminoimidazole carboxamide ribotide isomerase | 2.7                               | 3.1                     |                        |                    | up               |                  |                  | up                         |
| SAUSA300_2608                                                     | SA2467            | <i>hisA</i>  | hisA                                                                    |                                   |                         |                        |                    |                  |                  |                  |                            |
| SAUSA300_2608                                                     | SA2467            | <i>hisH</i>  | imidazole glycerol phosphate synthase subunit hisH                      | 2.8                               | 3.0                     |                        | up                 | up               |                  |                  | up                         |
| SAUSA300_2609                                                     | SA2468            | <i>hisB</i>  | imidazole glycerol phosphate dehydratase hisB                           | 3.3                               | 3.6                     |                        |                    | up               |                  |                  | up                         |
| SAUSA300_2610                                                     | SA2469            | <i>hisC</i>  | histidinol-phosphate aminotransferase hisC                              | 3.4                               | 3.7                     |                        |                    |                  |                  |                  |                            |
| SAUSA300_2611                                                     | SA2470            | <i>hisD</i>  | histidinol dehydrogenase hisD                                           | 3.2                               | 3.5                     |                        | up                 | up               |                  |                  | up                         |
| SAUSA300_2612                                                     | SA2471            | <i>hisG</i>  | ATP phosphoribosyltransferase hisG                                      | 3.1                               | 3.5                     |                        | up                 | up               |                  |                  | up                         |
| <b>Biosynthesis of cofactors, prosthetic groups, and carriers</b> |                   |              |                                                                         |                                   |                         |                        |                    |                  |                  |                  |                            |
| SAUSA300_1714                                                     | SA1588            | <i>ribE</i>  | riboflavin synthase, alpha subunit                                      |                                   | 1.0                     |                        |                    | up               |                  |                  |                            |
| <b>Cell envelope</b>                                              |                   |              |                                                                         |                                   |                         |                        |                    |                  |                  |                  |                            |
| SAUSA300_0079                                                     | ÷                 |              | putative lipoprotein                                                    | 1.0                               | 1.0                     |                        |                    |                  |                  |                  |                            |
| SAUSA300_0419                                                     | SA0397            | <i>lpl2</i>  | staphylococcus tandem lipoprotein                                       |                                   | 1.1                     |                        |                    |                  |                  |                  | up                         |

Table S2 continued...

| Functional group and annotation <sup>a</sup> |                   | Gene        | Assignment                                                      | log <sub>2</sub> expression ratio |                         | Early CWB <sup>c</sup> | D-CYC <sup>d</sup> | VAN <sup>e</sup> | BAC <sup>f</sup> | OXA <sup>g</sup> | Δ <i>cody</i> <sup>h</sup> |
|----------------------------------------------|-------------------|-------------|-----------------------------------------------------------------|-----------------------------------|-------------------------|------------------------|--------------------|------------------|------------------|------------------|----------------------------|
| USA300                                       | N315 <sup>b</sup> |             |                                                                 | TDZ vs. untreated                 | TDZ + DCX vs. untreated |                        |                    |                  |                  |                  |                            |
| SAUSA300_0622                                | SA0591            |             | putative membrane protein                                       | 2.2                               | 1.8                     |                        | up                 |                  | up               | up               |                            |
| SAUSA300_0689                                | SA0659            |             | glycosyl transferase, group 2 family protein                    |                                   | 1.0                     |                        |                    |                  |                  |                  |                            |
| SAUSA300_0891                                | SA0849            | <i>oppA</i> | oligopeptide ABC transporter, substrate-binding protein         | 2.8                               | 3.1                     | up                     | up                 | up               | up               | up               | up                         |
| SAUSA300_0934                                | SA0886            |             | membrane protein                                                |                                   | 1.1                     | up                     | up                 |                  |                  |                  | up                         |
| SAUSA300_0953                                | SA0903            |             | putative membrane protein                                       | 1.1                               |                         |                        | up                 |                  | up               | up               |                            |
| SAUSA300_1292                                | SA1231            | <i>alr2</i> | alanine racemase                                                | 2.1                               | 2.5                     | up                     |                    |                  |                  |                  | up                         |
| SAUSA300_1492                                | SA1361            |             | putative lipoprotein                                            | 1.2                               | 1.2                     |                        |                    |                  |                  |                  |                            |
| SAUSA300_1561                                | SA1432            |             | putative membrane protein                                       | 1.7                               | 1.8                     |                        | up                 | up               | up               | up               |                            |
| SAUSA300_1761                                | ÷                 | <i>epiE</i> | lantibiotic epidermin immunity protein F                        |                                   | 1.0                     |                        |                    |                  |                  |                  |                            |
| SAUSA300_2078                                | SA1926            | <i>murZ</i> | UDP-N-acetylglucosamine 1-carboxyvinyltransferase               | 1.2                               | 1.1                     |                        | up                 | up               | up               | up               |                            |
| SAUSA300_2448                                | SA2299            |             | putative membrane protein                                       | 1.1                               | 1.2                     |                        | up                 |                  | up               | up               |                            |
| SAUSA300_2614                                | SA2473            |             | putative lipoprotein                                            |                                   | 1.1                     | up                     |                    |                  |                  |                  | up                         |
| <b>Cellular processes</b>                    |                   |             |                                                                 |                                   |                         |                        |                    |                  |                  |                  |                            |
| SAUSA300_0190                                | SA0182            | <i>ipdC</i> | indole-3-pyruvate decarboxylase                                 | 1.7                               | 1.9                     |                        |                    |                  |                  |                  | up                         |
| SAUSA300_0959                                | SA0909            | <i>fntA</i> | fnt protein                                                     | 2.6                               | 2.4                     |                        | up                 | up               | up               | up               |                            |
| SAUSA300_1232                                | SA1170            | <i>kata</i> | catalase                                                        |                                   | 1.0                     | up                     |                    |                  |                  |                  | up                         |
| SAUSA300_1298                                | SA1237            |             | putative XpaC protein                                           | 1.5                               | 1.6                     |                        |                    |                  |                  | up               |                            |
| SAUSA300_1844                                | SA1680            | <i>bcp</i>  | bacterioferritin comigratory protein                            |                                   | 1.1                     |                        |                    |                  |                  |                  |                            |
| SAUSA300_2302                                | SA2146            | <i>tcaA</i> | teicoplanin resistance associated membrane protein TcaA protein | 2.0                               | 1.7                     |                        | up                 | up               | up               | up               |                            |
| SAUSA300_2545                                | SA2405            | <i>betA</i> | choline dehydrogenase                                           |                                   | 1.1                     |                        | up                 |                  | up               | up               |                            |
| SAUSA300_2546                                | SA2406            | <i>betB</i> | glycine betaine aldehyde dehydrogenase                          | 1.2                               | 1.5                     |                        |                    |                  |                  |                  |                            |
| SAUSA300_2631                                | SA2490            |             | putative N-acetyltransferase                                    | 1.4                               | 1.4                     | up                     | up                 |                  | up               | up               |                            |
| <b>Central intermediary metabolism</b>       |                   |             |                                                                 |                                   |                         |                        |                    |                  |                  |                  |                            |
| SAUSA300_0859                                | SA0817            |             | NADH-dependent flavin oxidoreductase                            |                                   | 1.1                     |                        |                    |                  |                  |                  |                            |
| SAUSA300_1565                                | SA1436            |             | putative urea amidolyase                                        | 3.0                               | 3.1                     |                        | up                 | up               |                  | up               |                            |
| SAUSA300_1669                                | SA1544            |             | aminotransferase, class V                                       | 2.4                               | 2.6                     |                        |                    | up               |                  |                  | up                         |
| SAUSA300_2159                                | SA2001            |             | aldo/keto reductase family protein                              | 1.4                               | 1.4                     |                        |                    |                  |                  |                  |                            |
| SAUSA300_2497                                | SA2347            |             | aminotransferase, class I                                       | 1.5                               | 1.7                     | up                     |                    | up               |                  |                  | up                         |
| SAUSA300_2554                                | SA2413            | <i>cysJ</i> | sulfite reductase flavoprotein                                  | 1.2                               | 1.0                     |                        |                    | up               |                  |                  |                            |
| <b>DNA metabolism</b>                        |                   |             |                                                                 |                                   |                         |                        |                    |                  |                  |                  |                            |
| pUSA03_0001                                  | ÷                 | <i>repA</i> | replication initiator protein                                   |                                   | 1.1                     |                        |                    |                  |                  |                  |                            |
| SAUSA300_1854                                | SA1690            |             | regulatory protein RecX                                         | 1.4                               | 1.5                     |                        |                    |                  |                  |                  |                            |
| SAUSA300_1876                                | SA1711            |             | DNA polymerase IV                                               | 1.1                               |                         |                        |                    | up               |                  |                  |                            |
| <b>Energy metabolism</b>                     |                   |             |                                                                 |                                   |                         |                        |                    |                  |                  |                  |                            |
| SAUSA300_0055                                | ÷                 |             | alcohol dehydrogenase, zinc-containing                          | 2.4                               | 2.7                     |                        |                    |                  |                  |                  |                            |
| SAUSA300_0220                                | SA0218            | <i>pflB</i> | formate acetyltransferase                                       | 1.1                               |                         |                        | down               |                  | down             | down             |                            |
| SAUSA300_0234                                | SA0231            |             | putative flavohemoprotein                                       | 1.2                               | 1.2                     |                        | down               |                  | down             | down             |                            |
| SAUSA300_0964                                | SA0914            |             | chitinase-related protein                                       | 2.2                               | 2.0                     |                        | up                 | up               | up               | up               |                            |
| SAUSA300_0986                                | SA0937            | <i>cydA</i> | cytochrome D ubiquinol oxidase, subunit I                       | 1.7                               | 1.6                     |                        |                    |                  | up               | up               |                            |
| SAUSA300_0987                                | SA0938            | <i>cydB</i> | cytochrome D ubiquinol oxidase, subunit II                      | 1.5                               | 1.5                     |                        |                    |                  |                  |                  |                            |
| SAUSA300_1246                                | SA1184            | <i>citB</i> | aconitate hydratase                                             | 1.1                               | 1.2                     |                        |                    | up               |                  | up               |                            |
| SAUSA300_1640                                | SA1517            | <i>citC</i> | isocitrate dehydrogenase, NADP-dependent                        | 1.4                               | 1.6                     |                        |                    | up               |                  | up               |                            |
| SAUSA300_1641                                | SA1518            | <i>citZ</i> | citrate synthase II                                             | 1.1                               | 1.3                     |                        |                    | up               |                  | up               |                            |
| SAUSA300_2463                                | SA2312            | <i>ddh</i>  | D-lactate dehydrogenase                                         | 1.3                               | 1.4                     |                        |                    |                  |                  |                  |                            |
| SAUSA300_2601                                | SA2461            | <i>icaB</i> | intercellular adhesion protein B                                | 1.3                               | 1.4                     |                        |                    |                  |                  |                  | up                         |

Table S2 continued...

| Functional group and annotation <sup>a</sup>  |                   | Gene        | Assignment                                              | log <sub>2</sub> expression ratio |                         | Early CWB <sup>c</sup> | D-CYC <sup>d</sup> | VAN <sup>e</sup> | BAC <sup>f</sup> | OXA <sup>g</sup> | Δ <i>cody</i> <sup>h</sup> |
|-----------------------------------------------|-------------------|-------------|---------------------------------------------------------|-----------------------------------|-------------------------|------------------------|--------------------|------------------|------------------|------------------|----------------------------|
| USA300                                        | N315 <sup>b</sup> |             |                                                         | TDZ vs. untreated                 | TDZ + DCX vs. untreated |                        |                    |                  |                  |                  |                            |
| <b>Fatty acid and phospholipid metabolism</b> |                   |             |                                                         |                                   |                         |                        |                    |                  |                  |                  |                            |
| SAUSA300_1563                                 | SA1434            | <i>accC</i> | acetyl-CoA carboxylase, biotin carboxylase              | 2.2                               | 2.4                     |                        | up                 | up               | up               | up               |                            |
| SAUSA300_1564                                 | SA1435            | <i>accB</i> | acetyl-CoA carboxylase, biotin carboxyl carrier protein | 2.9                               | 3.0                     |                        |                    | up               |                  | up               |                            |
| SAUSA300_1667                                 | SA1542            |             | putative glycerophosphoryl diester phosphodiesterase    | 1.1                               | 1.2                     |                        |                    |                  |                  |                  |                            |
| <b>Hypothetical proteins</b>                  |                   |             |                                                         |                                   |                         |                        |                    |                  |                  |                  |                            |
| pUSA03_0030                                   | ÷                 |             | conserved hypothetical protein                          | 1.6                               | 1.8                     |                        |                    |                  |                  |                  |                            |
| SAUSA300_0081                                 | SA0078            |             | conserved hypothetical protein                          | 1.2                               | 1.4                     |                        |                    |                  |                  |                  |                            |
| SAUSA300_0198                                 | ÷                 |             | conserved hypothetical protein                          | 1.6                               | 1.8                     |                        |                    |                  |                  |                  |                            |
| SAUSA300_0199                                 | ÷                 |             | conserved hypothetical protein                          | 1.4                               | 1.6                     |                        |                    |                  |                  |                  |                            |
| SAUSA300_0207                                 | SA0205            |             | conserved hypothetical protein                          | 2.0                               | 2.0                     |                        |                    |                  |                  |                  |                            |
| SAUSA300_0232                                 | SA0230            |             | conserved hypothetical protein                          | 1.1                               | 1.1                     |                        |                    |                  |                  |                  |                            |
| SAUSA300_0356                                 | SA0343            |             | conserved hypothetical protein                          |                                   | 1.1                     |                        |                    | up               |                  |                  | up                         |
| SAUSA300_0385                                 | SA0372            |             | conserved hypothetical protein                          |                                   | 1.1                     |                        |                    |                  |                  |                  |                            |
| SAUSA300_0508                                 | SA0481            |             | conserved hypothetical protein                          |                                   | 1.0                     | up                     |                    | up               |                  |                  |                            |
| SAUSA300_0561                                 | SA0535            | <i>vraC</i> | hypothetical protein                                    | 1.8                               | 1.7                     |                        | up                 |                  |                  |                  |                            |
| SAUSA300_0781                                 | SA0752            |             | conserved hypothetical protein                          |                                   | 1.2                     |                        |                    |                  |                  |                  |                            |
| SAUSA300_0866                                 | SA0824            |             | conserved hypothetical protein                          | 1.7                               | 1.5                     |                        |                    |                  | up               |                  |                            |
| SAUSA300_0903                                 | SA0860            |             | conserved hypothetical protein                          | 1.1                               | 1.1                     |                        |                    |                  |                  |                  |                            |
| SAUSA300_0929                                 | SA0883            |             | conserved hypothetical protein                          | 3.5                               | 3.7                     | up                     |                    |                  |                  |                  | up                         |
| SAUSA300_0942                                 | SA0892            |             | conserved hypothetical protein                          | 1.3                               | 1.4                     |                        |                    |                  |                  |                  |                            |
| SAUSA300_0957                                 | SA0907            |             | conserved hypothetical protein                          | 1.0                               |                         |                        |                    |                  |                  |                  |                            |
| SAUSA300_1069                                 | SA1018            |             | conserved hypothetical protein                          | 1.0                               | 1.1                     |                        |                    |                  |                  |                  |                            |
| SAUSA300_1107                                 | SA1057            |             | conserved hypothetical protein                          | 1.3                               | 1.4                     |                        |                    |                  |                  |                  |                            |
| SAUSA300_1180                                 | SAS037            |             | conserved hypothetical protein                          | 1.6                               | 1.5                     |                        |                    |                  |                  |                  |                            |
| SAUSA300_1224                                 | SA1162            |             | conserved hypothetical protein                          | 1.2                               | 1.1                     |                        |                    |                  |                  |                  |                            |
| SAUSA300_1277                                 | SA1215            |             | conserved hypothetical protein                          | 1.0                               |                         |                        | up                 |                  | up               | up               |                            |
| SAUSA300_1296                                 | SA1235            |             | conserved hypothetical protein                          | 1.5                               | 1.4                     | up                     |                    |                  |                  |                  |                            |
| SAUSA300_1297                                 | SA1236            |             | conserved hypothetical protein                          | 1.6                               | 1.7                     | up                     |                    |                  |                  | up               |                            |
| SAUSA300_1314                                 | SA1254            |             | conserved hypothetical protein                          | 1.8                               | 1.7                     | up                     | up                 | up               | up               | up               |                            |
| SAUSA300_1338                                 | SA1280            |             | conserved hypothetical protein                          |                                   | 1.1                     |                        |                    |                  |                  |                  |                            |
| SAUSA300_1339                                 | SA1281            |             | conserved hypothetical protein                          | 1.3                               | 1.3                     |                        |                    |                  |                  |                  |                            |
| SAUSA300_1493                                 | SA1362            |             | conserved hypothetical protein                          | 1.1                               | 1.0                     |                        |                    |                  |                  |                  |                            |
| SAUSA300_1566                                 | SA1437            |             | conserved hypothetical protein                          | 2.7                               | 2.8                     |                        |                    | up               |                  | up               |                            |
| SAUSA300_1606                                 | SA1476            |             | conserved hypothetical protein                          | 2.3                               | 2.2                     |                        |                    | up               |                  |                  |                            |
| SAUSA300_1671                                 | SA1546            |             | conserved hypothetical protein                          | 1.5                               | 1.6                     | up                     |                    | up               |                  |                  | up                         |
| SAUSA300_1723                                 | SA1597            |             | conserved hypothetical protein                          | 1.1                               |                         |                        |                    |                  |                  |                  |                            |
| SAUSA300_1867                                 | SA1702            | <i>yvqF</i> | conserved hypothetical protein                          | 2.6                               | 2.5                     |                        | up                 | up               | up               | up               |                            |
| SAUSA300_1868                                 | SA1703            |             | conserved hypothetical protein                          | 2.7                               | 2.7                     |                        | up                 | up               | up               | up               |                            |
| SAUSA300_1877                                 | SA1712            |             | conserved hypothetical protein                          | 2.6                               | 2.3                     |                        | up                 | up               | up               | up               |                            |
| SAUSA300_2077                                 | SA1925            |             | conserved hypothetical protein                          | 1.4                               | 1.3                     |                        |                    |                  |                  |                  | up                         |
| SAUSA300_2261                                 | SA2105            |             | conserved hypothetical protein                          | 1.0                               | 1.0                     |                        |                    |                  |                  |                  |                            |
| SAUSA300_2269                                 | SA2113            |             | conserved hypothetical protein                          | 3.3                               | 2.8                     |                        |                    | up               |                  |                  |                            |
| SAUSA300_2378                                 | SA2221            |             | conserved hypothetical protein                          | 2.2                               | 2.1                     | up                     | up                 | up               | up               | up               |                            |
| SAUSA300_2418                                 | SA2262            |             | conserved hypothetical protein                          | 1.1                               | 1.2                     |                        |                    |                  |                  |                  |                            |
| SAUSA300_2421                                 | SA2265            |             | conserved hypothetical protein                          | 1.3                               | 1.4                     |                        |                    |                  |                  |                  |                            |
| SAUSA300_2446                                 | SA2297            |             | conserved hypothetical protein                          | 2.0                               | 2.0                     |                        | up                 | up               | up               | up               |                            |
| SAUSA300_2475                                 | SA2325            |             | conserved hypothetical protein                          |                                   | 1.0                     |                        |                    |                  |                  |                  |                            |
| SAUSA300_2493                                 | SA2343            | <i>cwrA</i> | conserved hypothetical protein                          | 5.1                               | 4.7                     |                        | up                 | up               | up               | up               |                            |

Table S2 continued...

| Functional group and annotation <sup>a</sup>              |                   | Gene                    | Assignment                                                  | log <sub>2</sub> expression ratio |                         | Early CWB <sup>c</sup> | D-CYC <sup>d</sup> | VAN <sup>e</sup> | BAC <sup>f</sup> | OXA <sup>g</sup> | Δ <i>cody</i> <sup>h</sup> |
|-----------------------------------------------------------|-------------------|-------------------------|-------------------------------------------------------------|-----------------------------------|-------------------------|------------------------|--------------------|------------------|------------------|------------------|----------------------------|
| USA300                                                    | N315 <sup>b</sup> |                         |                                                             | TDZ vs. untreated                 | TDZ + DCX vs. untreated |                        |                    |                  |                  |                  |                            |
| SAUSA300_2604                                             | ÷                 |                         | conserved hypothetical protein                              | 2.1                               | 2.6                     |                        |                    |                  |                  |                  |                            |
| SAUSA300_2613                                             | SA2472            |                         | conserved hypothetical protein                              | 3.0                               | 3.2                     |                        |                    |                  |                  |                  | up                         |
| SAUSA300_2615                                             | SA2474            |                         | conserved hypothetical protein                              | 1.5                               | 1.7                     |                        |                    | up               |                  |                  | up                         |
| SAUSA300_2618                                             | SA2477            |                         | conserved hypothetical protein                              | 2.2                               | 2.4                     | up                     |                    |                  |                  |                  | up                         |
| SAUSA300_2619                                             | SA2478            |                         | conserved hypothetical protein                              | 2.0                               | 2.3                     | up                     |                    |                  |                  |                  | up                         |
| SAUSA300_2621                                             | SA2480            | <i>drp35</i>            | conserved hypothetical protein                              | 1.1                               |                         |                        |                    | up               |                  |                  |                            |
| <b>Mobile and extrachromosomal element functions</b>      |                   |                         |                                                             |                                   |                         |                        |                    |                  |                  |                  |                            |
| SAUSA300_1434                                             | ÷                 |                         | phiSLT ORF104a-like protein, repressor                      | 1.2                               | 1.5                     |                        |                    |                  |                  |                  |                            |
| SAUSA300_1435                                             | ÷                 |                         | phiSLT ORF153-like protein                                  | 1.0                               | 1.3                     |                        |                    |                  |                  |                  |                            |
| SAUSA300_1436                                             | ÷                 |                         | phiSLT ORF144-like protein, putative lipoprotein            |                                   | 1.1                     |                        |                    |                  |                  |                  |                            |
| SAUSA300_1438                                             | SA1835            | <i>int</i>              | phiSLT ORF401-like protein, integrase                       | 1.0                               | 1.2                     |                        |                    |                  |                  |                  |                            |
| <b>Protein fate</b>                                       |                   |                         |                                                             |                                   |                         |                        |                    |                  |                  |                  |                            |
| SAUSA300_0867                                             | SA0825            | <i>spsA</i>             | signal peptidase IA                                         | 1.4                               | 1.2                     |                        |                    | up               |                  |                  |                            |
| SAUSA300_0868                                             | SA0826            | <i>spsB</i>             | signal peptidase IB                                         | 1.2                               |                         |                        |                    |                  |                  |                  |                            |
| SAUSA300_0877                                             | SA0835            | <i>clpB</i>             | Chaperone clpB                                              | 1.3                               | 1.5                     | up                     |                    | up               |                  | up               |                            |
| SAUSA300_1278                                             | SA1216            | <i>pepF</i>             | oligoendopeptidase F                                        | 1.1                               | 1.1                     |                        |                    |                  |                  | up               |                            |
| SAUSA300_1291                                             | SA1230            |                         | hippurate hydrolase                                         | 2.6                               | 3.0                     | up                     |                    | up               |                  |                  | up                         |
| SAUSA300_1313                                             | SA1253            | <i>ctpA</i>             | carboxyl-terminal protease                                  | 1.3                               | 1.3                     |                        |                    | up               |                  |                  |                            |
| SAUSA300_1316                                             | SA1256            | <i>msrB</i>             | methionine-R-sulfoxide reductase                            | 1.1                               | 1.1                     | up                     | up                 |                  | up               | up               |                            |
| SAUSA300_1317                                             | SA1257            | <i>msrA</i>             | methionine-S-sulfoxide reductase                            | 1.2                               | 1.1                     | up                     | up                 |                  | up               | up               |                            |
| SAUSA300_1654                                             | SA1530            | <i>pepQ</i>             | proline dipeptidase                                         | 1.2                               | 1.2                     |                        |                    |                  |                  |                  |                            |
| SAUSA300_1674                                             | SA1549            | <i>htrA<sub>1</sub></i> | putative serine protease HtrA                               | 2.2                               | 2.1                     |                        |                    | up               |                  |                  |                            |
| SAUSA300_1790                                             | SA1659            | <i>prsA</i>             | foldase protein PrsA precursor                              | 3.0                               | 3.0                     |                        | up                 | up               | up               | up               |                            |
| SAUSA300_1855                                             | SA1691            | <i>sgtB</i>             | monofunctional glycosyltransferase                          | 2.6                               | 2.4                     | up                     | up                 | up               | up               | up               |                            |
| SAUSA300_2588                                             | SA2446            | <i>secY</i>             | preprotein translocase, SecY protein                        | 1.0                               | 1.1                     |                        | up                 |                  |                  |                  |                            |
| <b>Protein synthesis</b>                                  |                   |                         |                                                             |                                   |                         |                        |                    |                  |                  |                  |                            |
| SAUSA300_0736                                             | SA0707            | <i>yfiA</i>             | ribosomal subunit interface protein                         | 3.2                               | 3.5                     | up                     |                    | up               |                  |                  | up                         |
| SAUSA300_1365                                             | SA1308            | <i>rpsA</i>             | 30S ribosomal protein S1                                    | 1.5                               | 1.6                     |                        |                    |                  |                  |                  |                            |
| SAUSA300_1525                                             | SA1394            | <i>glyS</i>             | glycyl-tRNA synthetase                                      | 1.3                               | 1.2                     |                        |                    |                  |                  |                  |                            |
| <b>Purines, pyrimidines, nucleosides, and nucleotides</b> |                   |                         |                                                             |                                   |                         |                        |                    |                  |                  |                  |                            |
| SAUSA300_0966                                             | SA0916            | <i>purE</i>             | phosphoribosylaminoimidazole carboxylase, catalytic subunit | 1.3                               |                         |                        |                    |                  |                  |                  |                            |
| SAUSA300_0967                                             | SA0917            | <i>purK</i>             | phosphoribosylaminoimidazole carboxylase, ATPase subunit    | 1.1                               |                         |                        |                    |                  |                  |                  | up                         |
| SAUSA300_0968                                             | SA0918            | <i>purC</i>             | phosphoribosylaminoimidazole-succinocarboxamide synthase    | 2.1                               | 1.7                     |                        |                    |                  |                  |                  | up                         |
| SAUSA300_0969                                             | SA0919            | <i>purS</i>             | phosphoribosylformylglycinamide synthase                    | 1.8                               | 1.5                     |                        |                    |                  |                  |                  | up                         |
| SAUSA300_0970                                             | SA0920            | <i>purQ</i>             | phosphoribosylformylglycinamide synthase I                  | 1.9                               | 1.5                     |                        |                    |                  |                  |                  | up                         |
| SAUSA300_0971                                             | SA0921            | <i>purL</i>             | phosphoribosylformylglycinamide synthase II                 | 2.0                               | 1.6                     |                        |                    |                  |                  |                  | up                         |
| SAUSA300_0972                                             | SA0922            | <i>purF</i>             | amidophosphoribosyltransferase                              | 1.5                               | 1.1                     |                        |                    |                  |                  |                  | up                         |
| SAUSA300_0973                                             | SA0923            | <i>purM</i>             | phosphoribosylformylglycinamide cyclo-ligase                | 1.4                               | 1.1                     |                        |                    |                  |                  |                  | up                         |
| SAUSA300_0974                                             | SA0924            | <i>purN</i>             | phosphoribosylglycinamide formyltransferase                 | 1.7                               | 1.3                     |                        |                    |                  |                  |                  | up                         |
| SAUSA300_0975                                             | SA0925            | <i>purH</i>             | bifunctional purine biosynthesis protein                    | 1.2                               |                         |                        |                    |                  |                  |                  |                            |
| SAUSA300_2551                                             | SA2410            | <i>nrdD</i>             | anaerobic ribonucleotide reductase, large subunit           | 1.1                               |                         |                        |                    |                  |                  |                  |                            |
| <b>Regulatory functions</b>                               |                   |                         |                                                             |                                   |                         |                        |                    |                  |                  |                  |                            |
| SAUSA300_0093                                             | ÷                 |                         | transcriptional regulator, LysR family domain protein       |                                   | 1.1                     |                        |                    |                  |                  |                  |                            |
| SAUSA300_0507                                             | SA0480            | <i>ctsR</i>             | transcriptional regulator CtsR                              | 1.1                               | 1.5                     | up                     |                    |                  |                  |                  |                            |

Table S2 continued...

| Functional group and annotation <sup>a</sup> |                   | Gene         | Assignment                                                            | log <sub>2</sub> expression ratio |                         | Early CWB <sup>c</sup> | D-CYC <sup>d</sup> | VAN <sup>e</sup> | BAC <sup>f</sup> | OXA <sup>g</sup> | Δ <i>codY</i> <sup>h</sup> |
|----------------------------------------------|-------------------|--------------|-----------------------------------------------------------------------|-----------------------------------|-------------------------|------------------------|--------------------|------------------|------------------|------------------|----------------------------|
| USA300                                       | N315 <sup>b</sup> |              |                                                                       | TDZ vs. untreated                 | TDZ + DCX vs. untreated |                        |                    |                  |                  |                  |                            |
| SAUSA300_0509                                | SA0482            |              | ATP guanido phosphotransferase                                        |                                   | 1.1                     | up                     |                    | up               |                  |                  |                            |
| SAUSA300_0605                                | SA0573            | <i>sarA</i>  | staphylococcal accessory regulator A                                  | 1.4                               | 1.2                     |                        |                    |                  |                  |                  |                            |
| SAUSA300_0653                                | SA0622            |              | transcriptional regulator, AraC family                                |                                   | 1.0                     |                        |                    |                  |                  |                  |                            |
| SAUSA300_1279                                | SA1217            | <i>phoU</i>  | phosphate transport system regulatory protein PhoU                    | 1.8                               | 1.5                     |                        |                    |                  | up               |                  |                            |
| SAUSA300_2160                                | SA2002            |              | transcriptional regulator, MerR family                                | 1.7                               | 1.8                     |                        |                    |                  |                  |                  |                            |
| SAUSA300_2259                                | SA2103            |              | putative transcriptional regulator                                    | 2.6                               | 2.4                     |                        | up                 | up               | up               | up               |                            |
| SAUSA300_2445                                | SA2296            |              | transcriptional regulator, MerR family                                | 2.1                               | 1.9                     |                        |                    | up               |                  |                  |                            |
| <b>Signal transduction</b>                   |                   |              |                                                                       |                                   |                         |                        |                    |                  |                  |                  |                            |
| SAUSA300_1865                                | SA1700            | <i>vraR</i>  | DNA-binding response regulator                                        | 2.6                               | 2.6                     |                        |                    | up               |                  |                  |                            |
| SAUSA300_1866                                | SA1701            | <i>vraS</i>  | two-component sensor histidine kinase                                 | 2.5                               | 2.5                     |                        | up                 | up               | up               | up               |                            |
| <b>Transport and binding proteins</b>        |                   |              |                                                                       |                                   |                         |                        |                    |                  |                  |                  |                            |
| SAUSA300_0231                                | SA0229            |              | ABC transporter, substrate-binding protein                            | 1.1                               |                         |                        |                    |                  |                  |                  |                            |
| SAUSA300_0306                                | SA0294            | <i>brnQ</i>  | branched-chain amino acid transport system II carrier protein         | 1.0                               | 1.1                     |                        |                    |                  |                  |                  | up                         |
| SAUSA300_0558                                | SA0531            | <i>proP</i>  | putative proline/betaine transporter                                  | 1.1                               |                         |                        |                    | up               |                  |                  |                            |
| SAUSA300_0611                                | SA0579            |              | putative Na <sup>+</sup> /H <sup>+</sup> antiporter, MnhB component   |                                   | 1.2                     |                        |                    |                  |                  |                  |                            |
| SAUSA300_0612                                | SA0580            |              | putative Na <sup>+</sup> /H <sup>+</sup> antiporter, MnhC component   |                                   | 1.1                     |                        |                    |                  |                  |                  |                            |
| SAUSA300_0784                                | SA0753            |              | LysE/YggA family protein                                              | 1.0                               |                         |                        |                    |                  |                  |                  | up                         |
| SAUSA300_0796                                | SA0769            |              | ABC transporter, ATP-binding protein                                  | 1.1                               | 1.1                     |                        |                    |                  |                  |                  | up                         |
| SAUSA300_0797                                | SA0770            |              | ABC transporter permease protein                                      | 1.3                               | 1.4                     |                        |                    |                  |                  |                  | up                         |
| SAUSA300_0798                                | SA0771            |              | ABC transporter, substrate-binding protein                            |                                   | 1.0                     |                        |                    | up               |                  |                  | up                         |
| SAUSA300_0887                                | SA0845            | <i>oppB</i>  | oligopeptide ABC transporter, permease protein                        | 2.8                               | 3.0                     | up                     |                    | up               |                  |                  | up                         |
| SAUSA300_0888                                | SA0846            | <i>oppC</i>  | oligopeptide ABC transporter, permease protein                        | 2.7                               | 3.0                     | up                     | up                 | up               | up               | up               | up                         |
| SAUSA300_0889                                | SA0847            | <i>oppD</i>  | oligopeptide ABC transporter, ATP-binding protein                     | 2.5                               | 2.7                     | up                     | up                 | up               | up               | up               | up                         |
| SAUSA300_0890                                | SA0848            | <i>oppF</i>  | oligopeptide ABC transporter, ATP-binding protein                     | 2.7                               | 3.0                     | up                     | up                 | up               | up               | up               | up                         |
| SAUSA300_0941                                | SA0891            |              | putative ferrichrome ABC transporter                                  |                                   | 1.1                     |                        |                    |                  |                  |                  |                            |
| SAUSA300_0988                                | SA0939            | <i>trkA</i>  | potassium uptake protein                                              | 1.0                               |                         |                        |                    |                  |                  |                  |                            |
| SAUSA300_1280                                | SA1218            | <i>pstB</i>  | phosphate ABC transporter, ATP-binding protein                        | 2.2                               | 1.9                     |                        |                    |                  |                  |                  |                            |
| SAUSA300_1281                                | SA1219            | <i>pstA</i>  | phosphate ABC transporter, permease protein PstA                      | 2.3                               | 2.0                     |                        |                    |                  |                  |                  |                            |
| SAUSA300_1282                                | SA1220            | <i>pstC</i>  | phosphate ABC transporter, permease protein PstC                      | 2.0                               | 1.8                     |                        |                    |                  |                  |                  |                            |
| SAUSA300_1283                                | SA1221            | <i>pstS</i>  | phosphate ABC transporter, phosphate-binding protein PstS             | 2.4                               | 2.2                     |                        |                    |                  |                  |                  |                            |
| SAUSA300_1315                                | SA1255            | <i>crr</i>   | PTS system, glucose-specific IIA component                            | 1.4                               | 1.3                     | up                     | up                 | up               | up               | up               |                            |
| SAUSA300_1785                                | SA1654            | <i>ecsB</i>  | putative ABC transporter protein EcsB                                 | 1.1                               | 1.1                     |                        | up                 |                  | up               | up               |                            |
| SAUSA300_1786                                | SA1655            | <i>ecsA</i>  | ABC transporter, ATP-binding protein EcsA                             | 1.1                               | 1.2                     |                        |                    |                  |                  |                  |                            |
| SAUSA300_2306                                | SA2149            |              | ABC transporter, ATP-binding protein                                  | 1.1                               |                         |                        |                    |                  |                  |                  |                            |
| SAUSA300_2307                                | SA2150            |              | ABC transporter, permease protein                                     | 1.3                               |                         |                        |                    |                  |                  |                  |                            |
| SAUSA300_2391                                | SA2235            | <i>opuCc</i> | glycine betaine/carnitine/choline ABC transporter                     | 1.2                               | 1.1                     | up                     |                    |                  |                  |                  |                            |
| SAUSA300_2392                                | SA2236            | <i>opuCb</i> | glycine betaine/carnitine/choline ABC transporter                     | 1.3                               | 1.3                     | up                     |                    |                  |                  |                  |                            |
| SAUSA300_2393                                | SA2237            | <i>opuCa</i> | glycine betaine/carnitine/choline ABC transporter ATP-binding protein | 1.3                               | 1.4                     | up                     | up                 |                  |                  |                  |                            |
| SAUSA300_2434                                | SA2283            |              | transporter protein                                                   | 1.0                               | 1.2                     |                        |                    |                  |                  |                  |                            |
| SAUSA300_2538                                | SA2396            |              | amino acid permease family protein                                    | 1.3                               | 1.4                     | up                     | down               | up               | down             | down             | up                         |
| SAUSA300_2616                                | SA2475            |              | cobalt transport family protein                                       | 1.1                               | 1.3                     | up                     |                    | up               |                  |                  | up                         |
| SAUSA300_2617                                | SA2476            |              | putative cobalt ABC transporter, ATP-binding protein                  | 1.2                               | 1.4                     | up                     |                    | up               |                  |                  | up                         |
| SAUSA300_2630                                | SA2489            | <i>nixA</i>  | high-affinity nickel-transporter                                      | 1.8                               | 1.8                     |                        | up                 |                  | up               | up               |                            |
| <b>Unknown function</b>                      |                   |              |                                                                       |                                   |                         |                        |                    |                  |                  |                  |                            |
| SAUSA300_0129                                | SA0122            | <i>butA</i>  | Acetoin(diacetyl) reductase                                           | 1.4                               | 1.5                     | up                     | up                 | up               | up               | up               | up                         |

Table S2 continued...

| Functional group and annotation <sup>a</sup> |                   | Gene        | Assignment                                                   | log <sub>2</sub> expression ratio |                         | Early CWB <sup>c</sup> | D-CYC <sup>d</sup> | VAN <sup>e</sup> | BAC <sup>f</sup> | OXA <sup>g</sup> | $\Delta$ <i>codY</i> <sup>h</sup> |
|----------------------------------------------|-------------------|-------------|--------------------------------------------------------------|-----------------------------------|-------------------------|------------------------|--------------------|------------------|------------------|------------------|-----------------------------------|
| USA300                                       | N315 <sup>b</sup> |             |                                                              | TDZ vs. untreated                 | TDZ + DCX vs. untreated |                        |                    |                  |                  |                  |                                   |
| SAUSA300_0189                                | SA0181            | <i>entB</i> | isochorismatase                                              | 1.9                               | 2.2                     |                        |                    |                  |                  |                  |                                   |
| SAUSA300_0643                                | SA0612            |             | acetyltransferase, GNAT family                               | 1.1                               | 1.2                     | up                     |                    |                  |                  |                  |                                   |
| SAUSA300_0688                                | SA0658            |             | oxidoreductase, aldo/keto reductase family                   | 1.1                               | 1.3                     |                        |                    |                  |                  |                  |                                   |
| SAUSA300_1070                                | SA1019            |             | acetyltransferase, GNAT family                               |                                   | 1.1                     | up                     |                    |                  | up               |                  |                                   |
| SAUSA300_1257                                | SA1195            | <i>msrR</i> | peptide methionine sulfoxide reductase regulator MsrR        | 1.9                               | 1.5                     |                        | up                 |                  | up               | up               |                                   |
| SAUSA300_1562                                | SA1433            |             | LamB/YcsF family protein                                     | 2.3                               | 2.4                     |                        |                    | up               |                  |                  | up                                |
| SAUSA300_1656                                | SA1532            |             | universal stress protein family                              | 2.0                               | 2.1                     | up                     |                    | up               | up               |                  | <b>up</b>                         |
| SAUSA300_1668                                | SA1543            |             | OsmC/Ohr family protein                                      | 1.2                               | 1.4                     |                        |                    |                  |                  |                  |                                   |
| SAUSA300_2162                                | SA2004            |             | M23/M37 peptidase domain protein                             |                                   | 1.1                     |                        |                    |                  |                  |                  |                                   |
| SAUSA300_2496                                | SA2346            |             | D-isomer specific 2-hydroxyacid dehydrogenase family protein | 1.4                               | 1.6                     | up                     |                    | up               |                  |                  | <b>up</b>                         |
| SAUSA300_2573                                | SA2431            | <i>isaB</i> | immunodominant antigen B                                     |                                   | 1.2                     |                        |                    | up               |                  |                  |                                   |

<sup>a</sup> JCVI categories. Overrepresented categories as determined by Fisher's exact test (Benjamini-Hochberg corrected p-value < 0.05) following TDZ and TDZ + DCX treatment are marked by an asterisk (\*).

<sup>b</sup> Based on homology (Biocyc.org).

<sup>c</sup> Comparison to inhibition of early cell wall biosynthesis (CWB) (O'Neill *et al.* (2009). *Antimicrob Agents Chemother* 53: 1701-4). "down" and "up" indicate genes that were commonly down- or upregulated, respectively, in response to inhibition/depletion of MurA/MurZ, MurB, and MurE in *S. aureus*.

<sup>d</sup> "up" indicate genes that were upregulated following treatment of *S. aureus* with D-cycloserine (D-CYC) for 1 hr resulting in 44 % growth inhibition. "down" indicate genes that were commonly downregulated in response to D-CYC, BAC, and OXA (Utaiida *et al.* (2003). *Microbiol* 149: 2719-32).

<sup>e</sup> "down" and "up" indicate genes that were down- or upregulated, respectively, following treatment of *S. aureus* with vancomycin (VAN) at 10x MIC for 10 min (Kuroda *et al.* (2003). *Mol Microbiol* 49: 807-21). Genes that lost regulation in a  $\Delta$ *vraSR* mutant are shown in boldface typing.

<sup>f</sup> "up" indicate genes that were upregulated following treatment of *S. aureus* with bacitracin (BAC) for 1 hr resulting in 77.5 % growth inhibition. "down" indicate genes that were commonly downregulated in response to D-CYC, BAC, and OXA (Utaiida *et al.* (2003). *Microbiol* 149: 2719-32).

<sup>g</sup> "up" indicate genes that were upregulated following treatment of *S. aureus* with oxacillin (OXA) for 1 hr resulting in 32 % growth inhibition. "down" indicate genes that were commonly downregulated in response to D-CYC, BAC, and OXA (Utaiida *et al.* (2003). *Microbiol* 149: 2719-32).

<sup>h</sup> Differential gene expression in a  $\Delta$ *codY::ermC* mutant compared to the wild type in exponential growth phase. Genes that were overexpressed in the mutant are indicated by "up", whereas underexpressed genes are indicated by "down". Boldface typing indicates that a region of enrichment was found within the highlighted gene or within the intergenic region upstream of the highlighted gene in a CodY pulldown experiment as described by Majerczyk *et al.* (Majerczyk *et al.* (2010). *J Bacteriol* 192: 2861-77).
