# Supplementary material for: Thioridazine Induces Major Changes in Global Gene Expression and Cell Wall Composition in Methicillin-Resistant Staphylococcus aureus USA300
Source: PubMed Central journal article supplement (PMC3656896; doi:10.1371/journal.pone.0064518), 2013-05-17
Supplement: pone.0064518.s008.pdf [file pone.0064518.s008.pdf]

**Table S3. Genes downregulated by TDZ exposure.**

| Functional group and annotation <sup>a</sup>                      |                   | Gene         | Assignment                                                | log <sub>2</sub> expression ratio |                         | Early CWB <sup>c</sup> | CWSS <sup>d</sup> | VAN <sup>e</sup> | Δ <i>cody</i> <sup>f</sup> |
|-------------------------------------------------------------------|-------------------|--------------|-----------------------------------------------------------|-----------------------------------|-------------------------|------------------------|-------------------|------------------|----------------------------|
| USA300                                                            | N315 <sup>b</sup> |              |                                                           | TDZ vs. untreated                 | TDZ + DCX vs. untreated |                        |                   |                  |                            |
| <b>Amino acid biosynthesis</b>                                    |                   |              |                                                           |                                   |                         |                        |                   |                  |                            |
| SAUSA300_0209                                                     | SA0207            |              | putative maltose ABC transporter, maltose-binding protein | -1.3                              | -1.3                    |                        |                   |                  |                            |
| SAUSA300_0433                                                     | SA0418            | <i>cysM</i>  | cysteine synthase/cystathionine beta-synthase             | -1.0                              | -1.1                    |                        |                   | up               |                            |
| SAUSA300_0434                                                     | SA0419            | <i>metB</i>  | cystathionine gamma-synthase                              | -1.0                              | -1.1                    |                        |                   | up               |                            |
| SAUSA300_1052                                                     | SA1000            |              | fibrinogen-binding protein                                | -3.4                              | -3.4                    |                        |                   |                  | up                         |
| SAUSA300_2273                                                     | SA2117            |              | Na <sup>+</sup> /H <sup>+</sup> antiporter family protein |                                   | -1.0                    |                        |                   |                  |                            |
| SAUSA300_2454                                                     | SA2303            |              | membrane spanning protein                                 | -3.4                              | -3.2                    |                        | down              |                  |                            |
| <b>Biosynthesis of cofactors, prosthetic groups, and carriers</b> |                   |              |                                                           |                                   |                         |                        |                   |                  |                            |
| SAUSA300_0307                                                     | SA0295            |              | 5'-nucleotidase, lipoprotein e(P4) family                 | -1.6                              | -1.5                    |                        |                   |                  | up                         |
| SAUSA300_0696                                                     | SA0666            |              | 6-pyruvoyl tetrahydrobiopterin synthase-like protein      | -1.0                              | -1.2                    |                        |                   | down             |                            |
| SAUSA300_1661                                                     | SA1537            | <i>thiI</i>  | thiamine biosynthesis protein ThiI                        |                                   | -1.0                    |                        |                   | down             |                            |
| SAUSA300_1662                                                     | SA1538            |              | aminotransferase, class V                                 | -1.1                              | -1.1                    |                        |                   | down             |                            |
| <b>Cell envelope*</b>                                             |                   |              |                                                           |                                   |                         |                        |                   |                  |                            |
| SAUSA300_0130                                                     | SA0123            |              | NAD-dependent epimerase/dehydratase family protein        | -1.3                              | -1.3                    |                        |                   |                  |                            |
| SAUSA300_0131                                                     | SA0124            |              | putative bacterial sugar transferase                      | -1.5                              | -1.4                    |                        |                   |                  |                            |
| SAUSA300_0132                                                     | SA0125            |              | glycosyl transferase, group 1 family protein              | -1.1                              | -1.2                    |                        |                   |                  |                            |
| SAUSA300_0157                                                     | SA0149            | <i>cap5F</i> | capsular polysaccharide biosynthesis protein Cap5F        | -1.4                              | -1.4                    |                        |                   |                  | up                         |
| SAUSA300_0158                                                     | SA0150            | <i>cap5G</i> | capsular polysaccharide biosynthesis protein Cap5G        | -1.1                              | -1.2                    |                        |                   |                  | up                         |
| SAUSA300_0175                                                     | SA0167            |              | putative lipoprotein                                      | -2.9                              | -3.2                    |                        |                   | up               |                            |
| SAUSA300_0176                                                     | SA0168            |              | ABC transporter, permease protein                         | -2.6                              | -2.8                    |                        |                   | up               |                            |
| SAUSA300_0222                                                     | SA0220            |              | putative membrane protein                                 |                                   | -1.2                    |                        |                   |                  |                            |
| SAUSA300_0224                                                     | SA0222            | <i>coa</i>   | staphylocoagulase precursor                               | -2.6                              | -2.5                    |                        |                   | up               |                            |
| SAUSA300_0257                                                     | SA0253            | <i>lrgB</i>  | antiholin-like protein LrgB                               | -2.3                              | -2.6                    |                        |                   |                  |                            |
| SAUSA300_0273                                                     | SA0268            |              | putative membrane protein                                 | -2.0                              | -1.8                    | down                   |                   |                  | up                         |
| SAUSA300_0315                                                     | SA0304            | <i>nana</i>  | N-acetylneuraminase lyase subunit                         | -1.9                              | -2.2                    |                        |                   |                  |                            |
| SAUSA300_0346                                                     | SA0333            |              | putative membrane protein                                 |                                   | -1.1                    |                        |                   |                  |                            |
| SAUSA300_0374                                                     | SA0360            |              | putative membrane protein                                 | -1.1                              | -1.1                    |                        |                   |                  |                            |
| SAUSA300_0408                                                     | SA0394            |              | putative surface protein                                  | -3.3                              | -3.3                    |                        |                   | up               |                            |
| SAUSA300_0693                                                     | SA0663            | <i>saeP</i>  | putative lipoprotein                                      | -2.7                              | -2.7                    |                        |                   |                  | up                         |
| SAUSA300_0718                                                     | SA0688            | <i>sstA</i>  | iron compound ABC transporter, permease                   |                                   | -1.0                    |                        |                   |                  |                            |
| SAUSA300_1055                                                     | SA1003            | <i>efb</i>   | fibrinogen-binding protein                                | -3.1                              | -3.1                    |                        |                   |                  | up                         |
| SAUSA300_1324                                                     | SA1265            |              | putative membrane protein                                 | -1.0                              | -1.2                    |                        |                   |                  |                            |
| SAUSA300_1327                                                     | SA1267            | <i>ebhA</i>  | cell surface protein                                      | -1.2                              | -1.3                    |                        |                   |                  |                            |
| SAUSA300_1660                                                     | SA1536            |              | putative membrane protein                                 |                                   | -1.1                    |                        |                   |                  |                            |
| SAUSA300_1809                                                     | SA1676            |              | putative membrane protein                                 | -1.3                              | -1.5                    |                        |                   |                  |                            |
| SAUSA300_1998                                                     | SA1850            |              | putative membrane protein                                 | -1.9                              | -2.0                    | down                   |                   | up               |                            |
| SAUSA300_2256                                                     | SA2100            |              | putative N-acetylmuramoyl-L-alanine amidase               |                                   | -1.1                    |                        |                   |                  |                            |
| SAUSA300_2282                                                     | SA2126            | <i>lyrA</i>  | putative membrane protein                                 | -1.1                              | -1.2                    |                        |                   | down             |                            |
| SAUSA300_2287                                                     | SA2131            |              | putative membrane protein                                 | -1.4                              | -1.4                    |                        |                   |                  |                            |
| SAUSA300_2385                                                     | SA2229            |              | putative membrane protein                                 | -1.2                              | -1.5                    |                        |                   |                  |                            |
| SAUSA300_2435                                                     | ÷                 |              | cell wall surface anchor family protein                   | -1.1                              | -1.1                    |                        |                   |                  |                            |
| SAUSA300_2436                                                     | SA2285            | <i>sasG</i>  | putative cell wall surface anchor family protein          | -1.3                              | -1.2                    |                        | down              |                  |                            |
| SAUSA300_2439                                                     | SA2288            | <i>galU</i>  | UTP-glucose-1-phosphate uridylyltransferase               | -1.0                              | -1.2                    |                        |                   |                  |                            |
| SAUSA300_2440                                                     | SA2291            | <i>fmbB</i>  | fibronectin binding protein B                             | -3.1                              | -3.1                    |                        |                   |                  | down                       |

Table S3 continued...

| Functional group and annotation <sup>a</sup> |                   | Gene         | Assignment                                             | log <sub>2</sub> expression ratio |                         | Early CWB <sup>c</sup> | CWSS <sup>d</sup> | VAN <sup>e</sup> | Δ <i>codY</i> <sup>f</sup> |
|----------------------------------------------|-------------------|--------------|--------------------------------------------------------|-----------------------------------|-------------------------|------------------------|-------------------|------------------|----------------------------|
| USA300                                       | N315 <sup>b</sup> |              |                                                        | TDZ vs. untreated                 | TDZ + DCX vs. untreated |                        |                   |                  |                            |
| SAUSA300_2441                                | SA2290            | <i>fnbA</i>  | fibronectin binding protein A                          | -2.7                              | -2.7                    |                        |                   |                  |                            |
| <b>Cellular processes</b>                    |                   |              |                                                        |                                   |                         |                        |                   |                  |                            |
| SAUSA300_0120                                | SA0114            | <i>sbnC</i>  | siderophore biosynthesis protein, lucC family          | -1.1                              | -1.1                    |                        |                   |                  |                            |
| SAUSA300_0194                                | SA0186            |              | sucrose-specific PTS transporter protein               | -1.1                              | -1.2                    |                        |                   |                  |                            |
| SAUSA300_0354                                | SA0341            | <i>ltrA</i>  | low temperature requirement protein LtrA               | -1.4                              | -1.6                    |                        |                   |                  |                            |
| SAUSA300_0407                                | SA0393            | <i>set15</i> | exotoxin                                               | -3.9                              | -3.9                    |                        |                   | up               |                            |
| SAUSA300_0669                                | SA0638            | <i>bacA</i>  | undecaprenol kinase                                    | -1.3                              | -1.3                    |                        | up                |                  |                            |
| SAUSA300_0773                                | SA0743            |              | putative staphylocoagulase                             | -1.6                              | -1.7                    |                        |                   |                  |                            |
| SAUSA300_0777                                | SA0747            | <i>cspC</i>  | cold shock protein                                     | -1.2                              | -1.7                    |                        |                   |                  |                            |
| SAUSA300_1058                                | SA1007            | <i>hla</i>   | alpha-hemolysin precursor                              | -1.1                              | -1.1                    |                        |                   |                  | up                         |
| SAUSA300_1244                                | SA1182            | <i>mscL</i>  | large-conductance mechanosensitive channel protein     | -1.3                              | -1.5                    |                        |                   |                  |                            |
| SAUSA300_2249                                | SA2093            | <i>ssaA</i>  | secretory antigen precursor SsaA                       | -1.0                              | -1.1                    | down                   |                   | down             |                            |
| SAUSA300_2356                                | SA2199            | <i>fmhA</i>  | fmhA protein                                           | -1.3                              | -1.3                    |                        |                   |                  |                            |
| SAUSA300_2364                                | SA2206            | <i>sbi</i>   | IgG-binding protein SBI                                | -3.2                              | -3.2                    |                        |                   | up               | <b>up</b>                  |
| SAUSA300_2365                                | SA2207            | <i>hlgA</i>  | gamma-hemolysin component A                            | -1.3                              | -1.6                    |                        |                   | up               |                            |
| SAUSA300_2366                                | SA2208            | <i>hlgC</i>  | gamma-hemolysin component C                            | -1.3                              | -1.3                    |                        |                   | up               |                            |
| SAUSA300_2503                                | SA2353            |              | secretory antigen precursor SsaA                       | -1.2                              | -1.2                    |                        |                   |                  |                            |
| <b>Central intermediary metabolism</b>       |                   |              |                                                        |                                   |                         |                        |                   |                  |                            |
| SAUSA300_0229                                | SA0227            |              | putative acyl-CoA transferase FadX                     | -1.2                              | -1.2                    |                        |                   |                  |                            |
| SAUSA300_0318                                | SA0307            |              | N-acetylmannosamine-6-phosphate 2-epimerase            | -1.1                              | -1.1                    |                        |                   |                  |                            |
| SAUSA300_0464                                | SA0445            |              | methyltransferase                                      | -1.1                              | -1.2                    |                        |                   |                  |                            |
| SAUSA300_2255                                | SA2099            |              | monooxygenase family protein                           |                                   | -1.0                    |                        |                   |                  |                            |
| SAUSA300_2468                                | SA2317            |              | acetyltransferase, GNAT family                         | -1.1                              | -1.2                    |                        |                   |                  |                            |
| SAUSA300_2505                                | SA2355            |              | acetyltransferase, GNAT family                         | -1.5                              | -1.5                    |                        |                   | down             |                            |
| <b>DNA metabolism</b>                        |                   |              |                                                        |                                   |                         |                        |                   |                  |                            |
| SAUSA300_0776                                | SA0746            | <i>nuc</i>   | thermonuclease precursor                               | -2.9                              | -2.9                    |                        |                   |                  | up                         |
| SAUSA300_1222                                | SA1160            | <i>nuc</i>   | thermonuclease                                         | -1.1                              | -1.3                    | down                   |                   |                  |                            |
| SAUSA300_2037                                | SA1885            |              | ATP-dependent RNA helicase                             |                                   | -1.0                    |                        |                   | down             |                            |
| <b>Energy metabolism</b>                     |                   |              |                                                        |                                   |                         |                        |                   |                  |                            |
| SAUSA300_0119                                | SA0113            | <i>sbnB</i>  | ornithine cyclodeaminase                               | -1.5                              | -1.3                    |                        |                   |                  |                            |
| SAUSA300_0151                                | SA0143            | <i>adhE</i>  | alcohol dehydrogenase, iron-containing                 |                                   | -1.0                    |                        |                   |                  |                            |
| SAUSA300_0179                                | SA0171            | <i>fdh</i>   | putative D-isomer specific 2-hydroxyacid dehydrogenase | -1.7                              | -1.9                    |                        |                   | up               |                            |
| SAUSA300_0458                                | SA0439            |              | Orn/Lys/Arg decarboxylase                              | -1.0                              | -1.1                    |                        |                   |                  |                            |
| SAUSA300_0538                                | SA0511            |              | NAD-dependent epimerase/dehydratase family             | -1.6                              | -1.8                    |                        |                   |                  | up                         |
| SAUSA300_0960                                | SA0960            | <i>qoxD</i>  | quinol oxidase, subunit IV                             |                                   | -1.1                    |                        |                   |                  |                            |
| SAUSA300_1331                                | SA1272            | <i>ald</i>   | alanine dehydrogenase                                  | -1.1                              | -1.0                    |                        |                   |                  |                            |
| SAUSA300_2152                                | SA1994            | <i>lacD</i>  | tagatose 1,6-diphosphate aldolase                      | -1.3                              | -1.5                    |                        |                   |                  |                            |
| SAUSA300_2165                                | SA2007            | <i>budA</i>  | alpha-acetolactate decarboxylase                       |                                   | -1.2                    |                        |                   |                  |                            |
| SAUSA300_2278                                | SA2122            | <i>hutU</i>  | urocanate hydratase                                    | -1.4                              | -1.5                    |                        |                   |                  |                            |
| SAUSA300_2283                                | SA2127            | <i>rpiA</i>  | ribose-5-phosphate isomerase A                         |                                   | -1.0                    |                        |                   |                  |                            |
| SAUSA300_2285                                | SA2129            | <i>galM</i>  | aldose 1-epimerase                                     |                                   | -1.1                    |                        |                   |                  |                            |
| SAUSA300_2341                                | SA2183            | <i>narJ</i>  | respiratory nitrate reductase, delta subunit           |                                   | -1.1                    |                        | down              |                  |                            |

Table S3 continued...

| Functional group and annotation <sup>a</sup>         |                   | Gene        | Assignment                                   | log <sub>2</sub> expression ratio |                         | Early CWB <sup>c</sup> | CWSS <sup>d</sup> | VAN <sup>e</sup> | ΔcodY <sup>f</sup> |
|------------------------------------------------------|-------------------|-------------|----------------------------------------------|-----------------------------------|-------------------------|------------------------|-------------------|------------------|--------------------|
| USA300                                               | N315 <sup>b</sup> |             |                                              | TDZ vs. untreated                 | TDZ + DCX vs. untreated |                        |                   |                  |                    |
| SAUSA300_2342                                        | SA2184            | <i>narH</i> | respiratory nitrate reductase, beta subunit  | -1.1                              | -1.1                    |                        | down              |                  |                    |
| SAUSA300_2343                                        | SA2185            | <i>narG</i> | respiratory nitrate reductase, alpha subunit | -2.1                              | -2.3                    |                        | down              |                  |                    |
| <b>Fatty acid and phospholipid metabolism</b>        |                   |             |                                              |                                   |                         |                        |                   |                  |                    |
| SAUSA300_0099                                        | SA0091            | <i>plc</i>  | 1-phosphatidylinositol phosphodiesterase     | -1.4                              | -1.4                    |                        |                   |                  |                    |
| SAUSA300_0227                                        | SA0225            | <i>fadD</i> | acyl-CoA dehydrogenase FadD                  | -2.7                              | -2.9                    |                        |                   |                  |                    |
| SAUSA300_0228                                        | SA0226            | <i>fadE</i> | acyl-CoA synthetase FadE                     | -2.7                              | -3.0                    |                        |                   |                  |                    |
| SAUSA300_0320                                        | SA0309            | <i>geh</i>  | triacylglycerol lipase precursor             | -2.0                              | -1.9                    |                        | down              |                  | up                 |
| <b>Hypothetical proteins</b>                         |                   |             |                                              |                                   |                         |                        |                   |                  |                    |
| SAUSA300_0007                                        | SA0007            |             | conserved hypothetical protein               | -1.4                              | -1.6                    |                        |                   |                  |                    |
| SAUSA300_0036                                        | SA0054            |             | conserved hypothetical protein               | -1.2                              | -1.4                    |                        |                   |                  |                    |
| SAUSA300_0088                                        | ÷                 |             | hypothetical protein                         |                                   | -1.1                    |                        |                   |                  |                    |
| SAUSA300_0146                                        | SA0139            |             | conserved hypothetical protein               | -1.0                              | -1.1                    |                        |                   |                  |                    |
| SAUSA300_0168                                        | SA0160            |             | conserved hypothetical protein               | -1.2                              | -1.2                    |                        |                   |                  |                    |
| SAUSA300_0172                                        | SA0164            |             | conserved hypothetical protein               |                                   | -1.0                    |                        |                   |                  | up                 |
| SAUSA300_0173                                        | SA0165            |             | conserved hypothetical protein               | -2.7                              | -3.0                    |                        |                   |                  | up                 |
| SAUSA300_0174                                        | SA0166            |             | conserved hypothetical protein               | -2.6                              | -2.9                    |                        |                   |                  | up                 |
| SAUSA300_0177                                        | SA0169            |             | conserved hypothetical protein               | -2.6                              | -2.8                    |                        |                   |                  | up                 |
| SAUSA300_0178                                        | SA0170            |             | conserved hypothetical protein               | -1.7                              | -1.7                    |                        |                   |                  | up                 |
| SAUSA300_0192                                        | SA0184            |             | conserved hypothetical protein               |                                   | -1.0                    |                        |                   |                  |                    |
| SAUSA300_0193                                        | SA0185            |             | conserved hypothetical protein               | -1.5                              | -1.7                    |                        |                   |                  |                    |
| SAUSA300_0215                                        | SA0213            |             | conserved hypothetical protein               | -4.1                              | -4.3                    |                        | down              |                  |                    |
| SAUSA300_0261                                        | SA0257            |             | conserved hypothetical protein               |                                   | -1.1                    |                        |                   |                  |                    |
| SAUSA300_0272                                        | SA0267            |             | conserved hypothetical protein               | -1.7                              | -1.6                    |                        |                   |                  | up                 |
| SAUSA300_0274                                        | SA0269            |             | conserved hypothetical protein               | -2.6                              | -2.2                    |                        | down              |                  | up                 |
| SAUSA300_0463                                        | SA0444            |             | conserved hypothetical protein               |                                   | -1.1                    |                        |                   |                  |                    |
| SAUSA300_0692                                        | SA0662            | <i>saeQ</i> | conserved hypothetical protein               | -2.5                              | -2.5                    |                        |                   |                  | up                 |
| SAUSA300_0768                                        | ÷                 |             | conserved hypothetical protein               | -1.1                              |                         |                        |                   |                  |                    |
| SAUSA300_0940                                        | SA0890            |             | conserved hypothetical protein               |                                   | -1.2                    |                        |                   |                  |                    |
| SAUSA300_1054                                        | SA1002            |             | conserved hypothetical protein               | -1.2                              | -1.2                    |                        |                   |                  |                    |
| SAUSA300_1056                                        | SA1004            |             | conserved hypothetical protein               | -2.8                              | -2.9                    |                        |                   |                  |                    |
| SAUSA300_1240                                        | SA1178            |             | conserved hypothetical protein               |                                   | -1.0                    |                        |                   |                  |                    |
| SAUSA300_1796                                        | SA1664            |             | conserved hypothetical protein               |                                   | -1.0                    |                        |                   |                  |                    |
| SAUSA300_1797                                        | SA1665            |             | conserved hypothetical protein               | -1.4                              | -1.7                    |                        | down              |                  | down               |
| SAUSA300_1858                                        | SA1693            |             | conserved hypothetical protein               | -1.1                              | -1.2                    |                        |                   |                  |                    |
| SAUSA300_1919                                        | SA1754            |             | conserved hypothetical protein               | -1.4                              | -1.4                    |                        |                   |                  |                    |
| SAUSA300_1997                                        | SA1849            |             | conserved hypothetical protein               | -1.9                              | -2.2                    |                        |                   | up               |                    |
| SAUSA300_2095                                        | SA1944            |             | conserved hypothetical protein               |                                   | -1.1                    |                        |                   |                  |                    |
| SAUSA300_2481                                        | SA2331            |             | conserved hypothetical protein               |                                   | -1.1                    |                        |                   |                  |                    |
| SAUSA300_2482                                        | SA2332            |             | conserved hypothetical protein               | -1.0                              | -1.2                    |                        | down              |                  |                    |
| SAUSA300_2528                                        | SA2377            |             | conserved hypothetical protein               | -1.3                              | -1.3                    |                        |                   |                  | up                 |
| SAUSA300_2642                                        | SA2497            |             | conserved hypothetical protein               |                                   | -1.1                    |                        |                   |                  |                    |
| <b>Mobile and extrachromosomal element functions</b> |                   |             |                                              |                                   |                         |                        |                   |                  |                    |
| SAUSA300_1421                                        | ÷                 |             | phiSLT ORF122-like protein, DNA polymerase   | -1.0                              |                         |                        |                   |                  |                    |

Table S3 continued...

| Functional group and annotation <sup>a</sup>              |                   | Gene        | Assignment                                                        | log <sub>2</sub> expression ratio |                         | Early CWB <sup>c</sup> | CWSS <sup>d</sup> | VAN <sup>e</sup> | Δ <i>codY</i> <sup>f</sup> |
|-----------------------------------------------------------|-------------------|-------------|-------------------------------------------------------------------|-----------------------------------|-------------------------|------------------------|-------------------|------------------|----------------------------|
| USA300                                                    | N315 <sup>b</sup> |             |                                                                   | TDZ vs. untreated                 | TDZ + DCX vs. untreated |                        |                   |                  |                            |
| SAUSA300_1929                                             | SA1765            |             | phi77 ORF004-like protein, putative phage tail component          | -1.1                              | -1.1                    |                        |                   |                  | down                       |
| SAUSA300_1932                                             | ÷                 |             | conserved hypothetical phage protein                              | -1.0                              |                         |                        |                   |                  |                            |
| SAUSA300_1933                                             | ÷                 |             | hypothetical phage protein                                        | -1.1                              |                         |                        |                   |                  |                            |
| SAUSA300_1934                                             | ÷                 |             | phi77 ORF020-like protein, phage major tail protein               | -1.1                              |                         |                        |                   |                  |                            |
| SAUSA300_1937                                             | ÷                 |             | phi77 ORF045-like protein                                         | -1.0                              | -1.0                    |                        |                   |                  | down                       |
| SAUSA300_1938                                             | SA1774            |             | phi77 ORF006-like protein, putative capsid protein                |                                   | -1.0                    |                        |                   |                  |                            |
| SAUSA300_1939                                             | SA1775            |             | phi77 ORF015-like protein, putative protease                      | -1.1                              | -1.1                    |                        |                   |                  |                            |
| SAUSA300_1942                                             | SA1778            |             | conserved hypothetical phage protein                              | -1.0                              | -1.0                    |                        |                   |                  | down                       |
| SAUSA300_1943                                             | ÷                 |             | phi77 ORF040-like protein                                         | -1.1                              | -1.0                    |                        |                   |                  | down                       |
| <b>Protein fate</b>                                       |                   |             |                                                                   |                                   |                         |                        |                   |                  |                            |
| SAUSA300_0438                                             | SA0423            |             | CHAP domain family                                                | -2.1                              | -2.3                    | down                   | down              | down             |                            |
| SAUSA300_1890                                             | SA1725            |             | staphopain A                                                      | -1.8                              | -1.6                    |                        |                   |                  | up                         |
| SAUSA300_2572                                             | SA2430            | <i>aur</i>  | zinc metalloproteinase aureolysin                                 | -1.5                              | -1.4                    | down                   |                   |                  |                            |
| SAUSA300_2639                                             | SA2494            | <i>cspB</i> | cold shock protein                                                | -1.4                              | -2.1                    |                        |                   |                  |                            |
| <b>Protein synthesis</b>                                  |                   |             |                                                                   |                                   |                         |                        |                   |                  |                            |
| SAUSA300_0009                                             | SA0009            | <i>serS</i> | seryl-tRNA synthetase                                             | -1.2                              | -1.3                    | down                   |                   |                  |                            |
| SAUSA300_1134                                             | SA1084            | <i>rplS</i> | 50S ribosomal protein L19                                         |                                   | -1.1                    |                        |                   |                  |                            |
| SAUSA300_1545                                             | SA1414            | <i>rpsT</i> | 30S ribosomal protein S20                                         |                                   | -1.1                    |                        |                   |                  |                            |
| SAUSA300_2074                                             | SA1922            | <i>rpmE</i> | 50S ribosomal protein L31 type B                                  |                                   | -1.2                    |                        |                   |                  |                            |
| <b>Purines, pyrimidines, nucleosides, and nucleotides</b> |                   |             |                                                                   |                                   |                         |                        |                   |                  |                            |
| SAUSA300_0025                                             | SA0022            | <i>sasH</i> | 5'-nucleotidase family protein                                    | -1.7                              | -1.7                    |                        |                   |                  |                            |
| SAUSA300_2073                                             | SA1921            | <i>tdk</i>  | thymidine kinase                                                  |                                   | -1.1                    | down                   |                   |                  |                            |
| <b>Regulatory functions</b>                               |                   |             |                                                                   |                                   |                         |                        |                   |                  |                            |
| SAUSA300_0110                                             | SA0104            |             | transcriptional regulator, GntR family/aminotransferase           | -1.1                              | -1.2                    |                        |                   |                  |                            |
| SAUSA300_0114                                             | SA0108            | <i>sarS</i> | staphylococcal accessory regulator                                | -1.3                              | -1.3                    |                        |                   |                  |                            |
| SAUSA300_0311                                             | SA0299            |             | PfkB family carbohydrate kinase                                   | -1.0                              | -1.1                    |                        |                   |                  |                            |
| SAUSA300_2218                                             | SA2062            | <i>sarV</i> | staphylococcal accessory regulator                                | -1.1                              | -1.3                    |                        |                   |                  | up                         |
| SAUSA300_2247                                             | SA2091            | <i>sarY</i> | staphylococcal accessory regulator                                | -2.0                              | -1.7                    |                        |                   |                  |                            |
| SAUSA300_2248                                             | SA2092            |             | transcriptional regulator, AraC family                            | -2.0                              | -1.8                    |                        |                   |                  |                            |
| SAUSA300_2279                                             | SA2123            |             | LysR family regulatory protein                                    | -1.1                              | -1.3                    |                        |                   |                  |                            |
| SAUSA300_2347                                             | SA2189            | <i>nirR</i> | nitrite reductase transcriptional regulator NirR                  | -1.7                              | -1.7                    |                        | down              |                  |                            |
| SAUSA300_2367                                             | SA2209            | <i>hlgB</i> | gamma-hemolysin component B                                       |                                   | -1.1                    |                        |                   |                  | up                         |
| <b>Signal transduction</b>                                |                   |             |                                                                   |                                   |                         |                        |                   |                  |                            |
| SAUSA300_0255                                             | SA0251            | <i>lytR</i> | sensory transduction protein LytR                                 |                                   | -1.0                    |                        |                   |                  |                            |
| <b>Transport and binding proteins*</b>                    |                   |             |                                                                   |                                   |                         |                        |                   |                  |                            |
| SAUSA300_0068                                             | ÷                 |             | cadmium-exporting ATPase, truncation                              | -1.9                              | -2.6                    |                        |                   |                  |                            |
| SAUSA300_0112                                             | SA0106            | <i>lctP</i> | L-lactate permease                                                | -1.6                              | -1.6                    |                        |                   |                  |                            |
| SAUSA300_0115                                             | SA0109            | <i>sirC</i> | iron compound ABC transporter, permease protein SirC              | -1.1                              | -1.1                    |                        |                   |                  |                            |
| SAUSA300_0116                                             | SA0110            | <i>sirB</i> | iron compound ABC transporter, permease protein SirB              | -1.2                              | -1.2                    |                        |                   |                  |                            |
| SAUSA300_0117                                             | SA0111            | <i>sirA</i> | iron compound ABC transporter, iron compound-binding protein SirA | -1.4                              | -1.3                    | down                   |                   |                  |                            |

Table S3 continued...

| Functional group and annotation <sup>a</sup> |                   | Gene        | Assignment                                                            | log <sub>2</sub> expression ratio |                         | Early CWB <sup>c</sup> | CWSS <sup>d</sup> | VAN <sup>e</sup> | ΔcodY <sup>f</sup> |
|----------------------------------------------|-------------------|-------------|-----------------------------------------------------------------------|-----------------------------------|-------------------------|------------------------|-------------------|------------------|--------------------|
| USA300                                       | N315 <sup>b</sup> |             |                                                                       | TDZ vs. untreated                 | TDZ + DCX vs. untreated |                        |                   |                  |                    |
| SAUSA300_0142                                | SA0135            | <i>phnE</i> | phosphonate ABC transporter, permease protein                         |                                   | -1.1                    |                        |                   |                  |                    |
| SAUSA300_0143                                | SA0136            | <i>phnE</i> | phosphonate ABC transporter, permease protein                         | -1.0                              | -1.1                    |                        |                   |                  | up                 |
| SAUSA300_0144                                | SA0137            | <i>phnC</i> | phosphonate ABC transporter, ATP-binding protein                      | -1.6                              | -1.5                    |                        |                   |                  |                    |
| SAUSA300_0145                                | SA0138            |             | phosphonate ABC transporter, phosphonate-binding protein              | -1.1                              | -1.0                    |                        |                   |                  | up                 |
| SAUSA300_0191                                | SA0183            | <i>glcA</i> | PTS system, glucose-specific IIBC component domain protein            | -1.2                              | -1.3                    | down                   |                   |                  |                    |
| SAUSA300_0200                                | SA0198            | <i>oppF</i> | peptide ABC transporter, ATP-binding protein                          | -1.3                              | -1.4                    |                        |                   |                  |                    |
| SAUSA300_0208                                | SA0206            | <i>msmX</i> | putative maltose ABC transporter, ATP-binding protein                 | -1.6                              | -1.6                    |                        |                   |                  |                    |
| SAUSA300_0216                                | SA0214            | <i>uhpT</i> | hexose phosphate transport protein                                    | -1.5                              | -1.7                    |                        |                   |                  |                    |
| SAUSA300_0271                                | SA0266            |             | ABC transporter, ATP-binding protein                                  | -1.6                              | -1.6                    |                        |                   |                  | up                 |
| SAUSA300_0313                                | SA0302            |             | putative nucleoside permease NupC                                     |                                   | -1.0                    |                        |                   |                  |                    |
| SAUSA300_0314                                | SA0303            |             | sodium:solute symporter family protein                                | -1.6                              | -1.8                    |                        |                   |                  |                    |
| SAUSA300_0337                                | SA0325            | <i>glpT</i> | glycerol-3-phosphate transporter                                      | -1.6                              | -1.7                    | down                   |                   |                  |                    |
| SAUSA300_0382                                | SA0368            |             | sodium:dicarboxylate symporter family protein                         | -1.2                              | -1.3                    |                        |                   |                  |                    |
| SAUSA300_0432                                | SA0417            |             | sodium dependent transporter                                          |                                   | -1.2                    |                        |                   |                  |                    |
| SAUSA300_0506                                | SA0479            | <i>nupC</i> | pyrimidine nucleoside transport protein                               | -1.2                              | -1.5                    |                        |                   |                  |                    |
| SAUSA300_0598                                | SA0566            |             | putative iron compound ABC transporter, iron compound-binding protein | -1.2                              | -1.2                    |                        |                   |                  |                    |
| SAUSA300_1807                                | SA1674            |             | amino acid ABC transporter, ATP-binding protein                       | -1.0                              | -1.2                    |                        | down              |                  |                    |
| SAUSA300_2207                                | SA2050            |             | xanthine/uracil permease family protein                               |                                   | -1.0                    |                        |                   |                  |                    |
| SAUSA300_2235                                | SA2079            |             | iron compound ABC transporter, iron compound-binding protein          | -1.3                              | -1.6                    |                        |                   |                  |                    |
| SAUSA300_2288                                | SA2132            |             | ABC transporter, ATP-binding protein                                  | -1.5                              | -1.3                    |                        |                   |                  |                    |
| SAUSA300_2291                                | SA2135            | <i>gltS</i> | sodium/glutamate symporter                                            | -1.1                              | -1.1                    |                        |                   |                  |                    |
| SAUSA300_2324                                | SA2167            | <i>scrA</i> | PTS system, sucrose-specific IIBC component                           | -1.3                              | -1.4                    |                        |                   |                  |                    |
| SAUSA300_2349                                | SA2191            |             | formate/nitrite transporter family protein                            |                                   | -1.1                    |                        |                   |                  |                    |
| SAUSA300_2357                                | SA2200            |             | ABC transporter, ATP-binding protein                                  | -1.1                              | -1.3                    |                        |                   |                  |                    |
| SAUSA300_2358                                | SA2201            |             | ABC transporter, permease protein                                     |                                   | -1.0                    |                        |                   |                  |                    |
| SAUSA300_2397                                | SA2241            |             | putative transport protein                                            | -1.2                              | -1.3                    |                        |                   |                  |                    |
| SAUSA300_2449                                | SA2300            |             | putative transporter                                                  | -2.0                              | -2.1                    | down                   |                   | down             |                    |
| SAUSA300_2453                                | SA2302            |             | ABC transporter, ATP-binding protein                                  | -3.7                              | -3.4                    |                        |                   |                  | up                 |
| SAUSA300_2476                                | SA2326            | <i>ptsG</i> | phosphotransferase system, glucose-specific IIBC component            | -1.5                              | -1.7                    |                        |                   |                  |                    |
| SAUSA300_2489                                | SA2339            |             | similar to antibiotic transport-associated protein                    | -1.1                              | -1.3                    |                        |                   |                  |                    |
| SAUSA300_2627                                | SA2486            |             | 2-oxoglutarate/malate translocator                                    |                                   | -1.1                    | down                   |                   |                  |                    |
| <b>Unknown function</b>                      |                   |             |                                                                       |                                   |                         |                        |                   |                  |                    |
| SAUSA300_0053                                | ÷                 | <i>speG</i> | spermidine N(1)-acetyltransferase                                     |                                   | -1.1                    |                        |                   |                  |                    |
| SAUSA300_0089                                | SA0085            |             | probable tRNA-dihydrouridine synthase                                 | -1.2                              | -1.3                    | down                   |                   | down             |                    |
| SAUSA300_0206                                | SA0204            |             | flavodoxin family protein                                             | -1.2                              | -1.1                    |                        |                   |                  |                    |
| SAUSA300_0256                                | SA0252            | <i>lrgA</i> | holin-like protein lrgA                                               | -2.3                              | -2.6                    |                        |                   |                  |                    |
| SAUSA300_0312                                | SA0301            |             | indigoidine synthase family protein                                   | -1.1                              | -1.3                    |                        |                   |                  |                    |
| SAUSA300_0316                                | SA0305            |             | ROK family protein                                                    | -1.2                              | -1.2                    |                        |                   |                  |                    |
| SAUSA300_0697                                | SA0667            |             | exsB protein                                                          | -1.0                              | -1.2                    |                        |                   |                  |                    |
| SAUSA300_2457                                | SA2306            |             | phospholipase/carboxylesterase family protein                         | -1.1                              | -1.2                    |                        |                   |                  |                    |

<sup>a</sup> JCVI categories. Overrepresented categories as determined by Fisher's exact test (Benjamini-Hochberg corrected p-value < 0.05) following TDZ and TDZ + DCX treatment are marked by an asterisk (\*).

<sup>b</sup> Based on homology (Biocyc.org).

<sup>c</sup> Comparison to inhibition of early cell wall biosynthesis (CWB) (O'Neill *et al.* (2009). *Antimicrob Agents Chemother* 53: 1701-4). "down" and "up" indicate genes that were commonly down- or upregulated, respectively, in response to inhibition/depletion of MurA/MurZ, MurB, and MurE in *S. aureus*.

<sup>d</sup> Comparison to the cell wall stress stimulon (CWSS) (Utaiida *et al.* (2003). *Microbiol* 149: 2719-32). "down" and "up" indicate genes that were commonly down- or upregulated, respectively, in response to treatment of *S. aureus* with inhibitory concentrations of oxacillin (32 % inhibition), bacitracin (77.5 % inhibition), or D-cycloserine (44 % inhibition) for 1 hr.

<sup>e</sup> "down" and "up" indicate genes that were down- or upregulated, respectively, following treatment of *S. aureus* with vancomycin (VAN) at 10x MIC for 10 min (Kuroda *et al.* (2003). *Mol Microbiol* 49: 807-21). Genes that lost regulation in a  $\Delta$ *vraSR* mutant are shown in boldface typing.

<sup>f</sup> Differential gene expression in a  $\Delta$ *codY::ermC* mutant compared to the wild type in exponential growth phase. Genes that were overexpressed in the mutant are indicated by "up", whereas underexpressed genes are indicated by "down". Boldface typing indicates that a region of enrichment was found within the highlighted gene or within the intergenic region upstream of the highlighted gene in a CodY pulldown experiment as described by Majerczyk *et al.* (Majerczyk *et al.* (2010). *J Bacteriol* 192: 2861-77).
